# Supplementary material for: The association between childhood maltreatment and empathic perspective taking is moderated by the 5-HTT linked polymorphic region: Another example of “differential susceptibility”
Source: PubMed Central journal article supplement (PMC6922468; doi:10.1371/journal.pone.0226737), 2019-12-19
Supplement: pone.0226737.s001.pdf [file pone.0226737.s001.pdf]

**S1 Table. Data from genotyping, CTQ and IRI questionnaires for each participant.**

| <b>Participant No.</b> | <b>5-HTTLPR genotype</b> | <b>rs25531 genotype</b> | <b>CTQ total score</b> | <b>IRI perspective taking</b> |
|------------------------|--------------------------|-------------------------|------------------------|-------------------------------|
| 1                      | LS                       | La/Sa                   | 65                     | 19                            |
| 2                      | LL                       | Lg/La                   |                        | 16                            |
| 3                      | LS                       | Lg/Sa                   |                        | 12                            |
| 4                      | LL                       | La/La                   | 76                     | 11                            |
| 5                      | LL                       | La/La                   | 67                     | 19                            |
| 6                      | LS                       | La/Sa                   | 74                     | 10                            |
| 7                      | SS                       | Sa/Sa                   | 82                     |                               |
| 8                      | LS                       | La/Sa                   | 33                     | 21                            |
| 9                      | LS                       | La/Sg                   | 100                    | 11                            |
| 10                     | SS                       | Sa/Sa                   |                        | 14                            |
| 11                     | SS                       | Sa/Sa                   |                        | 16                            |
| 12                     | LL                       | La/La                   |                        | 5                             |
| 13                     | LS                       | La/Sa                   | 103                    | 3                             |
| 14                     | LL                       | Lg/La                   | 84                     | 16                            |
| 15                     | LL                       | Lg/La                   | 59                     | 15                            |
| 16                     | LL                       | Lg/La                   | 60                     | 13                            |
| 17                     | LS                       | La/Sa                   | 61                     | 13                            |
| 18                     | LL                       | La/La                   |                        |                               |
| 19                     | SS                       | Sa/Sa                   | 64                     | 20                            |
| 20                     | LL                       | La/La                   |                        | 9                             |
| 21                     | LS                       | Lg/Sa                   | 44                     | 0                             |
| 22                     | LS                       | La/Sa                   |                        | 14                            |
| 23                     | LL                       | La/La                   |                        | 1                             |
| 24                     | LS                       | La/Sa                   | 59                     |                               |
| 25                     | LS                       | La/Sa                   |                        | 14                            |
| 26                     | LL                       | La/La                   |                        | 11                            |
| 27                     | LS                       | La/Sa                   | 61                     | 17                            |
| 28                     | LL                       | La/La                   |                        | 12                            |
| 29                     | LS                       | La/Sa                   | 34                     | 13                            |
| 30                     | LS                       | La/Sa                   |                        | 17                            |
| 31                     | LL                       | La/La                   |                        | 9                             |
| 32                     | LL                       | La/La                   | 54                     | 19                            |
| 33                     | SS                       | Sa/Sa                   |                        | 18                            |
| 34                     | LS                       | La/Sa                   |                        | 17,5                          |
| 35                     | LL                       | La/La                   | 41                     | 7                             |
| 36                     | SS                       | Sa/Sa                   |                        | 21                            |
| 37                     | LL                       | La/La                   |                        |                               |
| 38                     | SS                       | Sa/Sa                   |                        | 14                            |
| 39                     | LS                       | La/Sa                   | 85                     | 22                            |
| 40                     | LS                       | Lg/Sa                   |                        | 9                             |
| 41                     | LL                       | La/La                   | 75                     | 4                             |
| 42                     | LL                       | La/La                   | 92                     | 18                            |
| 43                     | LS                       | La/Sa                   | 76                     | 3                             |
| 44                     | LL                       | Lg/La                   | 39                     | 9                             |
| 45                     | LS                       | La/Sa                   |                        |                               |
| 46                     | LS                       | La/Sa                   | 99                     | 19                            |
| 47                     | LL                       | Lg/La                   | 86                     | 11                            |
| 48                     | LL                       | La/La                   |                        | 10                            |
| 49                     | LL                       | La/La                   |                        | 14                            |
| 50                     | SS                       | Sa/Sa                   | 87                     | 18                            |

|     |    |       |      |      |
|-----|----|-------|------|------|
| 51  | SS | Sa/Sa |      | 18   |
| 52  | LL | La/La | 65   | 8    |
| 53  | SS | Sa/Sa | 35   | 17   |
| 54  | LS | La/Sa | 53   | 16   |
| 55  | LL | Lg/La | 46   | 22   |
| 56  | LS | La/Sa |      | 16,5 |
| 57  | LL | La/La | 78   | 16   |
| 58  | LL | La/La | 38   | 10   |
| 59  | LL | La/La | 82   | 13   |
| 60  | LS | La/Sa | 73   | 18   |
| 61  | LS | La/Sa | 51,5 | 16   |
| 62  | LS | La/Sa | 62   | 17   |
| 63  | LS | La/Sa | 62   | 24   |
| 64  | LL | La/La | 60   | 6    |
| 65  | SS | Sa/Sa | 39   | 28   |
| 66  | LS | La/Sa |      |      |
| 67  | LL | La/La | 73   | 18   |
| 68  | LS | La/Sa | 33   | 10   |
| 69  | LS | La/Sa | 60   | 13   |
| 70  | LL | La/La | 67   | 28   |
| 71  | LS | Lg/Sa | 35   | 13   |
| 72  | LS | La/Sa | 73   | 8    |
| 73  | LS | La/Sa | 60   | 20   |
| 74  | LL | La/La | 48   | 12   |
| 75  | LL | Lg/La | 42   | 12   |
| 76  | LS | La/Sa |      |      |
| 77  | LS | La/Sa | 91   |      |
| 78  | LL | La/La | 36   | 8    |
| 79  | LS | La/Sa |      |      |
| 80  | LS | La/Sa | 27   | 8    |
| 81  | LL | La/La | 63   | 13   |
| 82  | LS | La/Sa | 107  | 15   |
| 83  | LL | La/La |      | 20   |
| 84  | LS | Lg/Sa | 92   | 9    |
| 85  | LS | La/Sa | 34   | 16   |
| 86  | LL | Lg/La | 70   | 13   |
| 87  | LS | La/Sa |      |      |
| 88  | LS | La/Sa | 79   | 6    |
| 89  | LS | La/Sa | 60   |      |
| 90  | LL | La/La | 41   |      |
| 91  | LL | Lg/La | 85   | 14   |
| 92  | LL | La/La |      |      |
| 93  | LL | La/La | 59   | 12   |
| 94  | SS | Sa/Sa | 73   | 17   |
| 95  | LS | La/Sa | 44   | 9    |
| 96  | LS | La/Sa | 44   | 23   |
| 97  | LS | La/Sa | 79   | 8    |
| 98  | LS | La/Sa | 33   | 10   |
| 99  | LL | La/La | 66   | 20   |
| 100 | SS | Sa/Sa |      |      |
| 101 | LS | Lg/Sa | 83   | 9    |
| 102 | LL | La/La | 101  | 20   |
| 103 | LL | Lg/La | 71   | 15   |

|     |    |       |     |      |
|-----|----|-------|-----|------|
| 104 | SS | Sa/Sa | 63  | 16   |
| 105 | LS | La/Sa | 60  | 9    |
| 106 | LS | La/Sa | 72  | 11   |
| 107 | LS | Lg/Sa | 87  | 4    |
| 108 | LS | Lg/Sa | 45  |      |
| 109 | LL | Lg/La | 73  | 8    |
| 110 | SS | Sa/Sa | 101 | 12   |
| 111 | LS | La/Sa | 72  | 2    |
| 112 | LS | Lg/Sa | 55  | 6    |
| 113 | LL | La/La |     |      |
| 114 | SS | Sa/Sa | 47  | 18   |
| 115 | LL | La/La | 64  | 14   |
| 116 | LL | La/La | 80  | 19   |
| 117 | LS | La/Sa | 35  | 12,5 |
| 118 | LL | La/La | 84  | 33   |
| 119 | LS | La/Sa | 64  | 15   |
| 120 | LL | La/La | 39  | 19   |
| 121 | LL | Lg/La | 56  |      |
| 122 | LS | La/Sa | 78  | 16   |
| 123 | LL | La/La | 72  | 8    |
| 124 | LS | La/Sa | 71  | 16   |
| 125 | LS | La/Sa | 95  | 8    |
| 126 | LL | La/La | 43  | 12   |
| 127 | SS | Sa/Sa | 80  | 14   |
| 128 | LL | Lg/La | 52  | 16   |
| 129 | LL | La/La |     |      |
| 130 | SS | Sa/Sa | 53  | 17   |
| 131 | LL | La/La | 49  |      |
| 132 | SS | Sa/Sa | 62  | 17   |
| 133 | LL | La/La | 69  | 16   |
| 134 | LL | La/La | 71  | 7    |
| 135 | LS | La/Sa | 65  | 19   |
| 136 | SS | Sa/Sa | 37  |      |
| 137 | LS | Lg/Sa | 59  | 11   |
| 138 | LS | La/Sa | 37  |      |
| 139 | LL | Lg/La | 33  | 20   |
| 140 | LS | La/Sa | 44  |      |
| 141 | LS | La/Sa | 83  | 19   |
| 142 | LL | La/La | 97  | 14   |
| 143 | LS | La/Sa |     | 12   |
| 144 | LS | Lg/Sa |     | 19   |
| 145 | LL | Lg/La |     | 16   |
| 146 | LL | La/La | 28  | 11   |
| 147 | LS | Lg/La | 27  | 23   |
| 148 | LS | La/Sa |     | 17   |
| 149 | LL | La/La |     | 19   |
| 150 | LS | La/Sa | 27  | 25   |
| 151 | LS | La/Sa |     | 24   |
| 152 | SS | Sa/Sa |     | 14   |
| 153 | LL |       |     | 17   |
| 154 | LS | La/Sa |     | 23   |
| 155 | LL | Lg/La |     |      |
| 156 | LL | La/La | 30  | 19   |

|     |    |       |    |      |
|-----|----|-------|----|------|
| 157 | LS | La/Sa |    | 24   |
| 158 | LL | La/La | 29 | 26   |
| 159 | LL | La/La |    | 21   |
| 160 | LS | La/Sa |    | 22   |
| 161 | LS | La/Sa |    | 25   |
| 162 | LS | La/Sa |    | 27   |
| 163 | LL | La/La |    | 13   |
| 164 | LL | La/La | 27 | 18   |
| 165 | LS | La/Sa |    | 24   |
| 166 | LL | La/La | 26 | 22   |
| 167 | SS | Sa/Sa |    | 17   |
| 168 | LS | La/Sa |    | 19   |
| 169 | SS | Sa/Sa | 26 | 23   |
| 170 | SS | Sa/Sa |    | 17   |
| 171 | LL | La/La |    | 21   |
| 172 | SS | Sa/Sa |    | 22   |
| 173 | LL | La/La |    | 13   |
| 174 | LS | La/Sa |    |      |
| 175 | LS | La/Sa |    | 14   |
| 176 | SS | Sa/Sa | 29 | 15   |
| 177 | LS | La/Sa |    | 20   |
| 178 | LS | La/Sa | 31 | 19   |
| 179 | LS | La/Sa | 32 | 20   |
| 180 | LS | La/Sa | 32 | 16   |
| 181 | LS | La/Sa | 37 | 18   |
| 182 | LS | La/Sa | 27 | 21   |
| 183 | LS | La/Sa | 40 | 19   |
| 184 | LS | La/Sa | 31 | 13   |
| 185 | LL | La/La | 28 | 14   |
| 186 | LS | La/Sa | 27 | 19   |
| 187 | LS | La/Sa | 29 | 20   |
| 188 | LS | La/Sa | 33 | 16   |
| 189 | LL | La/La | 27 | 14   |
| 190 | LS | La/Sa | 26 | 11   |
| 191 | SS | Sa/Sa | 37 | 18   |
| 192 | LL | La/La | 45 | 9    |
| 193 | LL | Lg/La | 43 | 18   |
| 194 | LS | Lg/Sa | 28 | 16   |
| 195 | LL | La/La | 25 | 13   |
| 196 | LS | Lg/Sa | 26 | 20   |
| 197 | LS | La/Sa | 29 | 23   |
| 198 | SS | Sa/Sa | 35 | 25   |
| 199 | LS | La/Sa | 29 | 15   |
| 200 | LS | Lg/Sa | 35 | 21   |
| 201 | SS | Sa/Sa | 26 | 24   |
| 202 | SS | Sa/Sa |    | 15,5 |
| 203 | LL | La/La | 32 | 22   |
| 204 | LL | La/La | 39 | 22   |
| 205 | LL | La/La | 31 | 24   |
| 206 | LL | La/La | 25 | 18   |
| 207 | LS | La/Sa | 31 | 25   |
| 208 | LL | La/La | 28 | 16   |
| 209 | LS | La/Sa | 62 | 24   |

|     |    |       |    |    |
|-----|----|-------|----|----|
| 210 | LL | Lg/La | 29 | 16 |
| 211 | LL | La/La |    |    |
| 212 | LS | La/Sa | 36 | 19 |
| 213 | LL | La/La | 66 | 20 |
| 214 | LL | La/La | 63 | 26 |
| 215 | LL | La/La | 33 | 19 |
| 216 | LS | La/Sa | 36 | 25 |
| 217 | LL | La/La | 66 | 27 |
| 218 | LL | Lg/Lg | 63 | 21 |
| 219 | LS | La/Sa | 33 | 27 |
| 220 | LL | La/La | 42 | 21 |
| 221 | LS | La/Sa | 25 | 15 |
| 222 | LL | Lg/La | 32 | 21 |
| 223 | LS | La/Sa | 31 | 17 |
| 224 | LS | La/Sa | 26 | 16 |
| 225 | LS | La/Sa | 45 | 5  |
| 226 | LS | La/Sa | 28 | 20 |
| 227 | LL | Lg/La | 27 | 21 |
| 228 | LL | Lg/La | 46 | 17 |
| 229 | LL | La/La | 32 | 17 |
| 230 | LL | La/La | 40 | 21 |
| 231 | LL | Lg/La | 58 | 21 |
| 232 | SS | Sa/Sa | 35 | 23 |
| 233 | SS | Sa/Sa | 36 | 15 |
| 234 | LS | La/Sa | 30 | 16 |
| 235 | LS | Lg/Sa | 88 | 16 |
| 236 | LL | Lg/La | 55 | 24 |
| 237 | SS | Sa/Sa | 28 | 22 |
| 238 | SS | Sa/Sa | 28 | 21 |
| 239 | LS | La/Sa | 34 | 21 |
| 240 | SS | Sa/Sa | 38 | 10 |
| 241 | LL | Lg/La | 25 | 16 |
| 242 | LS | La/Sa | 34 | 13 |
| 243 | SS | Sa/Sa | 33 | 19 |
| 244 | SS | Sa/Sa | 25 | 22 |
| 245 | SS | Sa/Sa | 29 | 10 |
| 246 | LS | La/Sa | 30 | 21 |
| 247 | SS | Sa/Sa | 30 | 20 |
| 248 | SS | Sa/Sa | 32 | 25 |
| 249 | LS | La/Sa | 44 | 23 |
| 250 | LS | La/Sa | 25 | 18 |
| 251 | LS | La/Sa | 26 | 21 |
| 252 | LL | Lg/La | 35 | 25 |
| 253 | SS | Sa/Sa | 45 | 19 |
| 254 | LS | La/Sa | 43 | 18 |
| 255 | LL | La/La | 29 | 21 |
| 256 | LS | La/Sa | 25 | 20 |
| 257 | SS | Sa/Sa | 28 | 22 |
| 258 | LS | La/Sa | 26 | 15 |
| 259 | LS | Lg/Sa | 26 | 22 |
| 260 | LS | La/Sa | 29 | 19 |
| 261 | LS | La/Sa | 32 | 25 |
| 262 | LS | La/Sa | 26 | 23 |

|     |    |       |    |    |
|-----|----|-------|----|----|
| 263 | LS | La/Sa | 25 | 22 |
| 264 | SS | Sa/Sa | 25 | 24 |
| 265 | LS | La/Sa | 25 | 16 |
| 266 | LS | La/Sa | 25 | 18 |
| 267 | LS | La/Sa | 29 | 25 |
| 268 | LS | La/Sa | 28 | 19 |
| 269 | LL | La/La | 38 | 14 |
| 270 | LS | La/Sa | 29 | 12 |
| 271 | LS | La/Sa | 29 | 26 |
| 272 | SS | Sa/Sa | 26 | 17 |
| 273 | LL | La/La | 32 | 24 |
| 274 | LS | Lg/Sa | 29 | 25 |
| 275 | LS | La/Sa | 32 | 15 |
| 276 | SS | Sa/Sa | 34 | 24 |
| 277 | LL | La/La |    |    |
| 278 | LS | La/Sa | 26 | 22 |
| 279 | LS | La/Sa | 26 | 18 |

---
